# Supplementary material for: A Minimal Subset of Seven Genes Associated with Tumor Hepatocyte Differentiation Predicts a Poor Prognosis in Human Hepatocellular Carcinoma
Source: MDPI journal article supplement (doi:10.3390/cancers13225624), 2021-11-10
Supplement: s1 [file s1]

**Supplementary Table S1. List of genes differentially expressed between differentiated and progenitor HepaRG cells**

**A) Genes up-regulated in differentiated HepaRG cells**

| Probe ID      | Gene symbol | Expression value in differentiated HepaRG | Expression value in progenitor HepaRG | Fold-change FC differentiated/ progenitor | Parametric p-value | Log2 (FC) | Log10 (p-value) |
|---------------|-------------|-------------------------------------------|---------------------------------------|-------------------------------------------|--------------------|-----------|-----------------|
| A_23_P116898  | A2M         | 1.34                                      | 0.58                                  | 2.32                                      | 0.0008             | 1.21      | 3.12            |
| A_33_P3361112 | ABCG8       | 8.87                                      | 0.32                                  | 27.35                                     | 0.0008             | 4.77      | 3.08            |
| A_23_P376727  | ACMSD       | 2.1                                       | 0.34                                  | 6.14                                      | 0.0002             | 2.62      | 3.70            |
| A_24_P291658  | ADH1A       | 6.84                                      | 0.45                                  | 15.06                                     | 0.0002             | 3.91      | 3.60            |
| A_23_P149926  | AKR1C4      | 2.1                                       | 0.3                                   | 6.96                                      | 0.0005             | 2.80      | 3.34            |
| A_23_P36753   | ALDH2       | 1.3                                       | 0.64                                  | 2.04                                      | 0.0006             | 1.03      | 3.25            |
| A_24_P353619  | ALPL        | 1.18                                      | 0.37                                  | 3.15                                      | 0.0002             | 1.66      | 3.61            |
| A_33_P3295358 | ANGPTL4     | 1.79                                      | 0.072                                 | 24.97                                     | 0.0009             | 4.64      | 3.04            |
| A_23_P60009   | ANXA13      | 6.45                                      | 0.42                                  | 15.27                                     | 0.0008             | 3.93      | 3.12            |
| A_23_P417974  | AQP11       | 2.28                                      | 0.72                                  | 3.16                                      | 0.0001             | 1.66      | 3.87            |
| A_23_P106362  | AQP9        | 1.28                                      | 0.27                                  | 4.78                                      | 0.0002             | 2.26      | 3.66            |
| A_33_P3252359 | BDH1        | 8.82                                      | 0.21                                  | 41.44                                     | 0.0001             | 5.37      | 4.23            |
| A_33_P3396886 | C11orf52    | 2                                         | 0.9                                   | 2.23                                      | 0.0002             | 1.16      | 3.62            |
| A_32_P162187  | C2          | 1.12                                      | 0.39                                  | 2.85                                      | 0.0005             | 1.51      | 3.34            |
| A_23_P42282   | C4B         | 1.12                                      | 0.55                                  | 2.05                                      | 0.0002             | 1.04      | 3.69            |
| A_33_P3284508 | CD14        | 1.09                                      | 0.4                                   | 2.7                                       | 0.0002             | 1.43      | 3.70            |
| A_23_P206359  | CDH1        | 2.91                                      | 0.46                                  | 6.33                                      | 0.0008             | 2.66      | 3.11            |
| A_33_P3268507 | CEACAM1     | 1.23                                      | 0.38                                  | 3.23                                      | 0.0007             | 1.69      | 3.18            |
| A_23_P156687  | CFB         | 1.01                                      | 0.31                                  | 3.23                                      | 0.0000             | 1.69      | 5.89            |
| A_23_P114740  | CFH         | 1.27                                      | 0.45                                  | 2.82                                      | 0.0001             | 1.50      | 3.90            |
| A_24_P92472   | CFI         | 1.38                                      | 0.65                                  | 2.11                                      | 0.0000             | 1.08      | 4.34            |
| A_23_P69293   | CHDH        | 1.75                                      | 0.78                                  | 2.26                                      | 0.0002             | 1.18      | 3.60            |
| A_23_P141035  | CHST4       | 2.08                                      | 0.67                                  | 3.12                                      | 0.0002             | 1.64      | 3.76            |
| A_33_P3249046 | CLDN2       | 3.14                                      | 0.4                                   | 7.92                                      | 0.0000             | 2.99      | 5.14            |
| A_33_P3242798 | CPS1        | 2.18                                      | 0.52                                  | 4.17                                      | 0.0003             | 2.06      | 3.57            |
| A_33_P3281985 | CR2         | 3.65                                      | 0.17                                  | 21.49                                     | 0.0005             | 4.43      | 3.34            |
| A_33_P3317670 | CRP         | 1.42                                      | 0.058                                 | 24.38                                     | 0.0009             | 4.61      | 3.04            |
| A_23_P163402  | CYP1A1      | 9.85                                      | 0.79                                  | 12.46                                     | 0.0000             | 3.64      | 4.99            |
| A_24_P208704  | CYP8B1      | 3.86                                      | 0.11                                  | 34.11                                     | 0.0000             | 5.09      | 4.38            |
| A_24_P10233   | DAPK2       | 1.96                                      | 0.55                                  | 3.57                                      | 0.0004             | 1.84      | 3.44            |

|               |            |      |      |       |        |      |      |
|---------------|------------|------|------|-------|--------|------|------|
| A_33_P3240163 | DEFB109P1B | 1.58 | 0.3  | 5.29  | 0.0002 | 2.40 | 3.74 |
| A_32_P175301  | DENND3     | 1.82 | 0.9  | 2.03  | 0.0001 | 1.02 | 4.05 |
| A_23_P15202   | DHODH      | 1.27 | 0.55 | 2.31  | 0.0002 | 1.21 | 3.80 |
| A_23_P139704  | DUSP6      | 2.68 | 0.55 | 4.88  | 0.0005 | 2.29 | 3.34 |
| A_33_P3365750 | EML5       | 2.45 | 0.9  | 2.71  | 0.0009 | 1.44 | 3.04 |
| A_33_P3420224 | ENTPD8     | 2.79 | 0.41 | 6.77  | 0.0002 | 2.76 | 3.72 |
| A_23_P375372  | FGA        | 1.16 | 0.23 | 4.95  | 0.0002 | 2.31 | 3.80 |
| A_23_P44274   | FGA        | 1.14 | 0.26 | 4.32  | 0.0002 | 2.11 | 3.78 |
| A_23_P500501  | FGFR3      | 1.79 | 0.64 | 2.81  | 0.0003 | 1.49 | 3.58 |
| A_23_P148088  | FGG        | 1.08 | 0.21 | 5.21  | 0.0001 | 2.38 | 4.11 |
| A_23_P128246  | FICD       | 1.41 | 0.54 | 2.61  | 0.0007 | 1.38 | 3.15 |
| A_23_P8497    | GHRHR      | 1.62 | 0.52 | 3.12  | 0.0009 | 1.64 | 3.03 |
| A_24_P404840  | GJB1       | 3.39 | 0.22 | 15.55 | 0.0002 | 3.96 | 3.72 |
| A_23_P75749   | GLYAT      | 5.98 | 0.81 | 7.35  | 0.0001 | 2.88 | 3.93 |
| A_23_P370666  | GLYATL1    | 5.34 | 0.32 | 16.6  | 0.0002 | 4.05 | 3.61 |
| A_33_P3369371 | GPX3       | 1.4  | 0.55 | 2.55  | 0.0008 | 1.35 | 3.08 |
| A_23_P133474  | GPX3       | 1.24 | 0.51 | 2.42  | 0.0001 | 1.28 | 4.26 |
| A_23_P29257   | H1FO       | 1.18 | 0.54 | 2.19  | 0.0001 | 1.13 | 3.97 |
| A_23_P154708  | HAO1       | 2.86 | 0.29 | 9.84  | 0.0003 | 3.30 | 3.50 |
| A_23_P103588  | HMGCS2     | 3.37 | 0.94 | 3.59  | 0.0003 | 1.84 | 3.48 |
| A_23_P206760  | HP         | 1.14 | 0.11 | 10.16 | 0.0000 | 3.34 | 6.52 |
| A_33_P3289236 | HPR        | 1.48 | 0.06 | 24.89 | 0.0003 | 4.64 | 3.57 |
| A_23_P252306  | ID1        | 1.37 | 0.16 | 8.58  | 0.0002 | 3.10 | 3.79 |
| A_23_P62607   | IL22RA1    | 1.23 | 0.55 | 2.23  | 0.0006 | 1.16 | 3.24 |
| A_24_P141707  | INHBE      | 2.88 | 0.43 | 6.71  | 0.0000 | 2.75 | 4.87 |
| A_33_P3260373 | ISY1-RAB43 | 1.17 | 0.54 | 2.17  | 0.0008 | 1.12 | 3.11 |
| A_23_P128084  | ITGA7      | 1.96 | 0.43 | 4.58  | 0.0010 | 2.20 | 3.01 |
| A_23_P319423  | KCNK5      | 2.12 | 0.53 | 3.97  | 0.0008 | 1.99 | 3.10 |
| A_32_P46594   | LOC145837  | 3.03 | 0.44 | 6.9   | 0.0002 | 2.79 | 3.64 |
| A_23_P50638   | LRG1       | 1.06 | 0.21 | 5.19  | 0.0000 | 2.38 | 4.63 |
| A_23_P103110  | MAFF       | 1.17 | 0.27 | 4.34  | 0.0002 | 2.12 | 3.74 |
| A_23_P23996   | MAT1A      | 2.33 | 0.22 | 10.5  | 0.0005 | 3.39 | 3.34 |
| A_33_P3215457 | MTTP       | 2.33 | 0.33 | 7.04  | 0.0008 | 2.82 | 3.10 |
| A_23_P328740  | NEURL3     | 2.18 | 0.45 | 4.85  | 0.0005 | 2.28 | 3.30 |
| A_33_P3406866 | NFASC      | 1.91 | 0.75 | 2.56  | 0.0008 | 1.36 | 3.11 |
| A_23_P41804   | NKD2       | 2.17 | 0.58 | 3.75  | 0.0010 | 1.91 | 3.02 |
| A_23_P160800  | NR0B2      | 2.06 | 0.56 | 3.67  | 0.0003 | 1.88 | 3.47 |
| A_23_P319572  | NR1I3      | 1.76 | 0.5  | 3.51  | 0.0007 | 1.81 | 3.16 |
| A_33_P3335057 | OR8U8      | 2.83 | 0.75 | 3.75  | 0.0010 | 1.91 | 3.01 |

|               |          |      |       |        |        |      |      |
|---------------|----------|------|-------|--------|--------|------|------|
| A_23_P169494  | ORM1     | 1.3  | 0.34  | 3.88   | 0.0009 | 1.96 | 3.04 |
| A_23_P2501    | PAH      | 9.58 | 0.24  | 40.74  | 0.0007 | 5.35 | 3.14 |
| A_23_P35977   | PDZD3    | 4.46 | 0.87  | 5.14   | 0.0001 | 2.36 | 4.27 |
| A_33_P3259917 | PGLYRP2  | 1.48 | 0.54  | 2.74   | 0.0006 | 1.45 | 3.20 |
| A_23_P210465  | PI3      | 1.13 | 0.51  | 2.22   | 0.0001 | 1.15 | 4.02 |
| A_23_P164258  | PIPOX    | 2.13 | 0.28  | 7.67   | 0.0001 | 2.94 | 4.01 |
| A_23_P388150  | PLA2G12B | 7.97 | 0.045 | 178.86 | 0.0002 | 7.48 | 3.81 |
| A_23_P50508   | PLA2G4C  | 1.06 | 0.45  | 2.32   | 0.0000 | 1.21 | 4.46 |
| A_32_P66364   | PPP1R1C  | 1.76 | 0.84  | 2.09   | 0.0006 | 1.06 | 3.23 |
| A_33_P3379922 | PROC     | 1.89 | 0.76  | 2.48   | 0.0000 | 1.31 | 4.95 |
| A_23_P165201  | PRODH2   | 2.06 | 0.28  | 7.31   | 0.0002 | 2.87 | 3.68 |
| A_23_P118392  | RASD1    | 1.88 | 0.12  | 15.53  | 0.0002 | 3.96 | 3.74 |
| A_24_P218814  | RDH5     | 2.27 | 0.93  | 2.43   | 0.0007 | 1.28 | 3.15 |
| A_23_P320578  | RGS16    | 2.02 | 0.79  | 2.54   | 0.0001 | 1.34 | 4.28 |
| A_33_P3408918 | SAA2     | 1.03 | 0.29  | 3.53   | 0.0001 | 1.82 | 4.06 |
| A_23_P87238   | SAA4     | 1.53 | 0.039 | 38.92  | 0.0007 | 5.28 | 3.14 |
| A_33_P3289659 | SERPINA1 | 1.24 | 0.086 | 14.31  | 0.0006 | 3.84 | 3.19 |
| A_23_P2920    | SERPINA3 | 1.33 | 0.13  | 9.96   | 0.0006 | 3.32 | 3.21 |
| A_33_P3399788 | SERPINA3 | 1.32 | 0.14  | 9.31   | 0.0010 | 3.22 | 3.01 |
| A_33_P3413989 | SERPING1 | 1.35 | 0.21  | 6.58   | 0.0008 | 2.72 | 3.09 |
| A_33_P3413987 | SERPING1 | 1.28 | 0.22  | 5.83   | 0.0008 | 2.54 | 3.10 |
| A_32_P205624  | SHC2     | 1.28 | 0.57  | 2.24   | 0.0010 | 1.16 | 3.02 |
| A_23_P42189   | SLC17A1  | 7.13 | 0.096 | 74.39  | 0.0010 | 6.22 | 3.01 |
| A_33_P3379926 | SLC17A4  | 3.98 | 0.2   | 19.8   | 0.0000 | 4.31 | 4.62 |
| A_33_P3409154 | SLC22A23 | 1.09 | 0.42  | 2.57   | 0.0003 | 1.36 | 3.50 |
| A_23_P422511  | SLC25A45 | 1.62 | 0.57  | 2.84   | 0.0008 | 1.51 | 3.11 |
| A_23_P64070   | SLC25A45 | 1.68 | 0.6   | 2.8    | 0.0002 | 1.49 | 3.64 |
| A_24_P179816  | SLC27A3  | 2.48 | 0.95  | 2.62   | 0.0002 | 1.39 | 3.72 |
| A_24_P268685  | SLC6A1   | 9.56 | 0.2   | 46.66  | 0.0002 | 5.54 | 3.61 |
| A_23_P131846  | SNAI1    | 1.16 | 0.24  | 4.86   | 0.0004 | 2.28 | 3.42 |
| A_23_P28186   | SRD5A2   | 5.08 | 0.14  | 37.12  | 0.0009 | 5.21 | 3.02 |
| A_23_P382188  | STAP2    | 1.17 | 0.4   | 2.95   | 0.0001 | 1.56 | 3.90 |
| A_23_P80974   | TDO2     | 3.62 | 0.22  | 16.76  | 0.0003 | 4.07 | 3.50 |
| A_23_P108157  | TJP3     | 2.43 | 0.73  | 3.33   | 0.0001 | 1.74 | 4.09 |
| A_33_P3230219 | TMEM54   | 2.01 | 0.83  | 2.42   | 0.0003 | 1.28 | 3.48 |
| A_23_P29067   | TMPRSS2  | 1.52 | 0.35  | 4.39   | 0.0004 | 2.13 | 3.38 |
| A_33_P3226810 | TNFSF10  | 0.96 | 0.24  | 4.02   | 0.0001 | 2.01 | 4.29 |
| A_23_P121253  | TNFSF10  | 0.92 | 0.24  | 3.82   | 0.0005 | 1.93 | 3.35 |
| A_24_P237036  | TNFSF14  | 1.2  | 0.5   | 2.38   | 0.0009 | 1.25 | 3.03 |

|                |             |      |      |       |        |      |      |
|----------------|-------------|------|------|-------|--------|------|------|
| A_23_P386912   | UGT2B4      | 4.04 | 0.16 | 25.87 | 0.0002 | 4.69 | 3.70 |
| A_19_P00809915 | XLOC_006829 | 2.68 | 0.92 | 2.92  | 0.0001 | 1.55 | 3.91 |
| A_23_P250619   | ZDHHC14     | 1.43 | 0.56 | 2.56  | 0.0000 | 1.36 | 5.46 |
| A_24_P269129   | ZDHHC14     | 1.27 | 0.63 | 2.01  | 0.0004 | 1.01 | 3.45 |
| A_33_P3372413  | nd          | 2.39 | 0.17 | 14.18 | 0.0003 | 3.83 | 3.59 |
| A_33_P3300495  | nd          | 2.86 | 0.54 | 5.27  | 0.0008 | 2.40 | 3.08 |
| A_32_P153979   | nd          | 1.11 | 0.33 | 3.33  | 0.0009 | 1.74 | 3.05 |
| A_33_P3240295  | nd          | 2.56 | 0.92 | 2.8   | 0.0002 | 1.49 | 3.62 |
| A_19_P00326161 | nd          | 1.03 | 0.41 | 2.51  | 0.0009 | 1.33 | 3.06 |
| A_33_P3227556  | nd          | 1.4  | 0.57 | 2.45  | 0.0007 | 1.29 | 3.13 |

## B) Genes down-regulated in differentiated HepaRG cells

| Probe ID      | Gene symbol | Expression value in differentiated HepaRG | Expression value in progenitor HepaRG | Fold-change FC differentiated/progenitor | Parametric p-value | Log2 (FC) | Log10 (p-value) |
|---------------|-------------|-------------------------------------------|---------------------------------------|------------------------------------------|--------------------|-----------|-----------------|
| A_23_P127948  | ADM         | 0.87                                      | 2.16                                  | 0.4                                      | 0.0009             | -1.32     | 3.05            |
| A_23_P379649  | BMF         | 0.27                                      | 3.08                                  | 0.089                                    | 0.0002             | -3.49     | 3.62            |
| A_33_P3284813 | C10orf113   | 0.6                                       | 3.02                                  | 0.2                                      | 0.0007             | -2.32     | 3.18            |
| A_33_P3312119 | C6orf99     | 0.18                                      | 5.6                                   | 0.032                                    | 0.0003             | -4.97     | 3.52            |
| A_33_P3218960 | CACNA1H     | 0.8                                       | 1.66                                  | 0.49                                     | 0.0003             | -1.03     | 3.59            |
| A_23_P21092   | CALB2       | 0.65                                      | 2.06                                  | 0.32                                     | 0.0007             | -1.64     | 3.14            |
| A_33_P3367341 | CASP7       | 0.26                                      | 1.03                                  | 0.25                                     | 0.0005             | -2.00     | 3.27            |
| A_33_P3287825 | CCDC136     | 0.88                                      | 1.83                                  | 0.48                                     | 0.0000             | -1.06     | 4.88            |
| A_23_P62764   | CCDC28B     | 0.68                                      | 1.52                                  | 0.45                                     | 0.0001             | -1.15     | 4.11            |
| A_23_P20752   | CDK20       | 0.99                                      | 2.23                                  | 0.44                                     | 0.0005             | -1.18     | 3.27            |
| A_33_P3213374 | CITED2      | 0.93                                      | 2.28                                  | 0.41                                     | 0.0004             | -1.29     | 3.45            |
| A_23_P205031  | COL4A2      | 0.56                                      | 1.22                                  | 0.45                                     | 0.0001             | -1.15     | 4.30            |
| A_33_P3227400 | COL4A4      | 0.41                                      | 2.06                                  | 0.2                                      | 0.0002             | -2.32     | 3.70            |
| A_23_P83818   | COL5A1      | 0.34                                      | 1.48                                  | 0.23                                     | 0.0002             | -2.12     | 3.65            |
| A_23_P7144    | CXCL1       | 0.42                                      | 1.24                                  | 0.34                                     | 0.0007             | -1.56     | 3.14            |
| A_23_P131676  | CXCR7       | 0.53                                      | 2.35                                  | 0.22                                     | 0.0002             | -2.18     | 3.68            |
| A_23_P152262  | DPEP1       | 0.24                                      | 2.72                                  | 0.089                                    | 0.0008             | -3.49     | 3.12            |
| A_33_P3251841 | DSEL        | 0.91                                      | 3.04                                  | 0.3                                      | 0.0005             | -1.74     | 3.27            |

|                |              |      |      |       |        |       |      |
|----------------|--------------|------|------|-------|--------|-------|------|
| A_23_P401606   | EDIL3        | 0.66 | 2.36 | 0.28  | 0.0001 | -1.84 | 4.30 |
| A_33_P3404749  | FMN1         | 0.71 | 2.26 | 0.31  | 0.0000 | -1.69 | 4.47 |
| A_23_P26037    | FRMD5        | 0.88 | 2.06 | 0.43  | 0.0008 | -1.22 | 3.12 |
| A_32_P74579    | GAS2L2       | 0.51 | 4.06 | 0.13  | 0.0009 | -2.94 | 3.07 |
| A_24_P227069   | GPAM         | 0.33 | 1.53 | 0.21  | 0.0001 | -2.25 | 3.94 |
| A_33_P3340639  | GPAM         | 0.25 | 1.91 | 0.13  | 0.0000 | -2.94 | 4.61 |
| A_19_P00330814 | HOTAIR       | 0.12 | 1.96 | 0.06  | 0.0000 | -4.06 | 5.80 |
| A_33_P3338698  | IHH          | 0.44 | 1.46 | 0.3   | 0.0003 | -1.74 | 3.48 |
| A_23_P15786    | KRT25        | 0.22 | 1.45 | 0.15  | 0.0002 | -2.74 | 3.81 |
| A_33_P3292886  | KRT6A        | 0.56 | 1.62 | 0.35  | 0.0005 | -1.51 | 3.34 |
| A_33_P3287800  | LBX2         | 0.45 | 1.35 | 0.33  | 0.0005 | -1.60 | 3.34 |
| A_23_P6771     | LMCD1        | 0.48 | 1.26 | 0.38  | 0.0003 | -1.40 | 3.49 |
| A_33_P3369436  | LOC100130111 | 0.8  | 1.94 | 0.41  | 0.0004 | -1.29 | 3.37 |
| A_33_P3285145  | LOC100131826 | 0.58 | 1.97 | 0.29  | 0.0010 | -1.79 | 3.01 |
| A_24_P306594   | LOC100506310 | 0.52 | 1.66 | 0.32  | 0.0001 | -1.64 | 3.96 |
| A_33_P3474859  | LOC203274    | 0.82 | 1.71 | 0.48  | 0.0005 | -1.06 | 3.32 |
| A_32_P63013    | LOC283174    | 0.14 | 4.24 | 0.033 | 0.0002 | -4.92 | 3.62 |
| A_19_P00318599 | LOC648987    | 0.63 | 1.34 | 0.47  | 0.0007 | -1.09 | 3.17 |
| A_33_P3364741  | MRC2         | 0.14 | 1.38 | 0.1   | 0.0002 | -3.32 | 3.75 |
| A_23_P148737   | MYBPH        | 0.83 | 4.18 | 0.2   | 0.0003 | -2.32 | 3.47 |
| A_23_P65278    | NBEA         | 0.86 | 1.96 | 0.44  | 0.0004 | -1.18 | 3.46 |
| A_24_P135322   | NRP1         | 0.81 | 1.85 | 0.44  | 0.0009 | -1.18 | 3.03 |
| A_23_P348257   | NUAK1        | 0.39 | 1.48 | 0.26  | 0.0001 | -1.94 | 3.88 |
| A_24_P229531   | OBFC2A       | 0.67 | 1.55 | 0.43  | 0.0004 | -1.22 | 3.39 |
| A_24_P299474   | ODZ2         | 0.74 | 2.86 | 0.26  | 0.0006 | -1.94 | 3.26 |
| A_33_P3599591  | PAPPA        | 0.64 | 1.68 | 0.38  | 0.0003 | -1.40 | 3.49 |
| A_23_P420236   | PCDH9        | 0.82 | 3.35 | 0.24  | 0.0001 | -2.06 | 3.92 |
| A_33_P3378514  | PDE5A        | 0.87 | 6.08 | 0.14  | 0.0001 | -2.84 | 4.03 |
| A_33_P3282162  | PLAC4        | 0.67 | 1.68 | 0.4   | 0.0010 | -1.32 | 3.02 |
| A_23_P17914    | PNPLA3       | 0.7  | 1.59 | 0.44  | 0.0007 | -1.18 | 3.17 |
| A_33_P3511265  | POSTN        | 0.64 | 1.98 | 0.33  | 0.0002 | -1.60 | 3.76 |
| A_24_P916496   | PRKCA        | 0.86 | 2.24 | 0.38  | 0.0006 | -1.40 | 3.21 |
| A_33_P3365087  | PRR20B       | 0.4  | 3.34 | 0.12  | 0.0004 | -3.06 | 3.35 |

|                |                |      |      |       |        |       |      |
|----------------|----------------|------|------|-------|--------|-------|------|
| A_33_P3294917  | PRUNE2         | 0.59 | 1.92 | 0.31  | 0.0002 | -1.69 | 3.75 |
| A_33_P3218832  | RIMS1          | 0.81 | 2.24 | 0.36  | 0.0007 | -1.47 | 3.14 |
| A_23_P216307   | RUNX1T1        | 0.51 | 4.68 | 0.11  | 0.0001 | -3.18 | 3.94 |
| A_33_P3269636  | SBSN           | 0.46 | 2.86 | 0.16  | 0.0007 | -2.64 | 3.14 |
| A_24_P760960   | SKINTL         | 0.14 | 1.81 | 0.075 | 0.0007 | -3.74 | 3.13 |
| A_33_P3277447  | SLC26A2        | 0.76 | 2.1  | 0.36  | 0.0005 | -1.47 | 3.31 |
| A_33_P3331906  | SNTB2          | 0.82 | 1.84 | 0.45  | 0.0000 | -1.15 | 4.45 |
| A_33_P3281333  | SNTB2          | 0.78 | 1.95 | 0.4   | 0.0002 | -1.32 | 3.65 |
| A_33_P3382924  | SPARC          | 0.43 | 1.4  | 0.31  | 0.0006 | -1.69 | 3.24 |
| A_23_P431388   | SPOCD1         | 0.41 | 2.25 | 0.18  | 0.0010 | -2.47 | 3.00 |
| A_32_P134968   | SPTB           | 0.89 | 2.41 | 0.37  | 0.0008 | -1.43 | 3.08 |
| A_32_P98072    | TCHH           | 0.54 | 2.51 | 0.22  | 0.0001 | -2.18 | 4.03 |
| A_33_P3345210  | TLCD2          | 0.68 | 1.38 | 0.49  | 0.0005 | -1.03 | 3.28 |
| A_23_P101392   | TMEM38A        | 1.01 | 2.13 | 0.47  | 0.0000 | -1.09 | 4.33 |
| A_32_P2452     | TMTC1          | 0.6  | 1.38 | 0.43  | 0.0008 | -1.22 | 3.10 |
| A_23_P94403    | TYRP1          | 0.79 | 1.97 | 0.4   | 0.0007 | -1.32 | 3.15 |
| A_33_P3279629  | UCN2           | 0.44 | 1.72 | 0.26  | 0.0002 | -1.94 | 3.66 |
| A_23_P102611   | WISP2          | 0.45 | 1.58 | 0.28  | 0.0009 | -1.84 | 3.06 |
| A_19_P00318909 | XLOC_I2_010751 | 0.85 | 1.97 | 0.43  | 0.0000 | -1.22 | 4.55 |
| A_19_P00321221 | XLOC_I2_011969 | 0.99 | 2.52 | 0.39  | 0.0007 | -1.36 | 3.15 |
| A_19_P00813148 | nd             | 0.95 | 2.02 | 0.47  | 0.0005 | -1.09 | 3.28 |
| A_33_P3415199  | nd             | 0.96 | 2.3  | 0.42  | 0.0010 | -1.25 | 3.02 |
| A_33_P3271341  | nd             | 0.65 | 1.67 | 0.39  | 0.0000 | -1.36 | 4.65 |
| A_19_P00321544 | nd             | 0.9  | 2.43 | 0.37  | 0.0002 | -1.43 | 3.61 |
| A_24_P691826   | nd             | 0.66 | 1.91 | 0.35  | 0.0006 | -1.51 | 3.21 |
| A_19_P00324423 | nd             | 0.87 | 2.59 | 0.34  | 0.0002 | -1.56 | 3.77 |
| A_33_P3401482  | nd             | 0.28 | 1.21 | 0.23  | 0.0003 | -2.12 | 3.58 |
| A_33_P3279193  | nd             | 0.25 | 5    | 0.051 | 0.0003 | -4.29 | 3.50 |
